# Supplementary material for: Influence of electronic polarization on the binding of anions to a chloride-pumping rhodopsin
Source: PubMed Central journal article supplement (PMC10147828; doi:10.1016/j.bpj.2023.03.026), 2023-03-21
Supplement: mmc1.pdf [file mmc1.pdf]

**Biophysical Journal, Volume 122**

**Supplemental information**

**Influence of electronic polarization on the binding of anions to a chloride-pumping rhodopsin**

**Linda X. Phan, Victor Cruces Chamorro, Hector Martinez-Seara, Jason Crain, Mark S.P. Sansom, and Stephen J. Tucker**

**Biophysical Journal, Volume 122**

**Supplemental information**

**Influence of electronic polarization on the binding of anions to a chloride-pumping rhodopsin**

**Linda X. Phan, Victor Cruces Chamorro, Hector Martinez-Seara, Jason Crain, Mark S.P. Sansom, and Stephen J. Tucker**

**Figure S1**

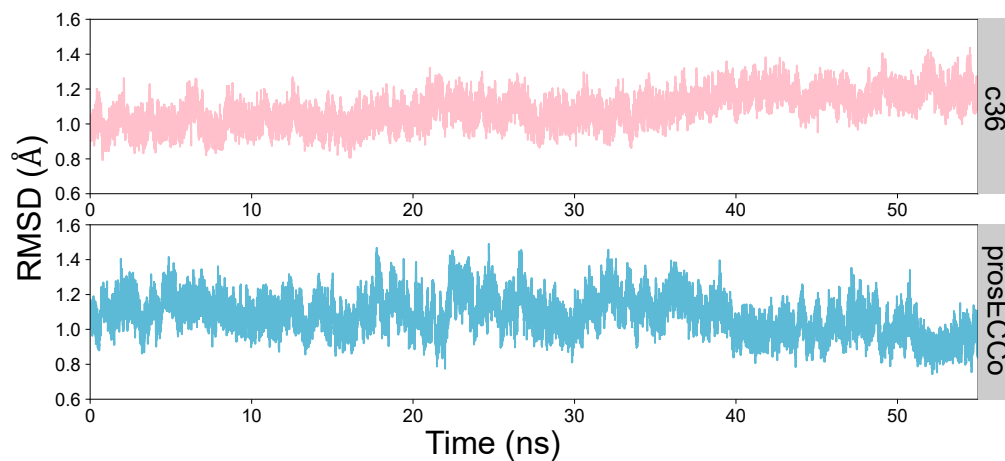

**Figure S1:** RMSDs of the protein backbone in simulations of the whole protein embedded in a lipid bilayer without backbone position restraints applied. The protein deviates by  $< 2.0 \text{ \AA}$  compared to the crystal structure and therefore justifies omitting the use of backbone restraints in simulations of the whole protein.

Figure S2

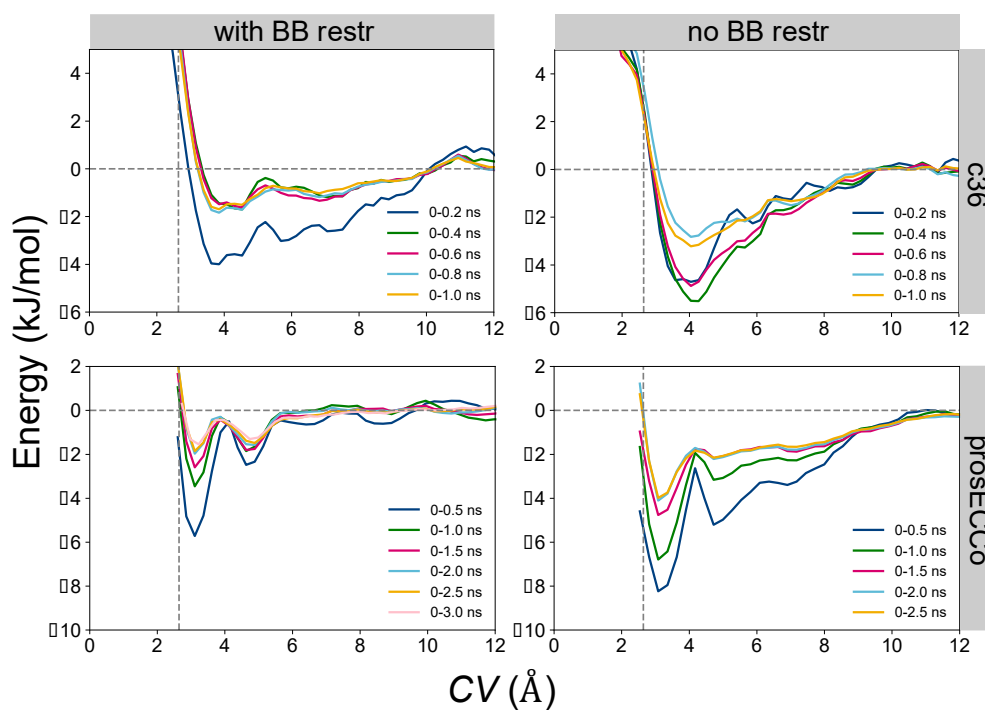

**Figure S2:** Cl<sup>-</sup> PMF convergence analysis using the CHARMM36 (c36) and prosECCo force fields with and without the use of protein backbone restraints. Convergence analysis was performed by calculating 0.2 ns and 0.5 ns sampling blocks over the sampling time for of 1.0 ns and 2.5 ns for c36 and prosECCo respectively. The vertical grey dashed line represents the position of the crystal structure binding site in terms of *CV*.

Figure S3

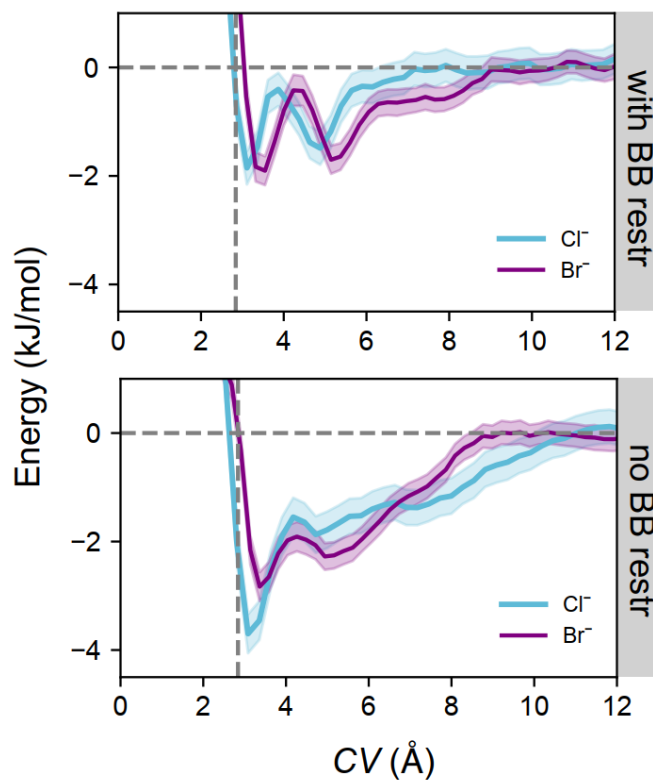

**Figure S3:** Potential of mean force profiles for a  $\text{Cl}^-$  and  $\text{Br}^-$  ion moving away from the binding site into bulk solution employing the prosECCo force field. Protein backbone restraints were not applied to the simulations. The horizontal grey dashed line represents the free energy of the ion in bulk solution and the vertical grey dashed line is representative of the location of the corresponding ion in the resolved crystal structure.

Figure S4

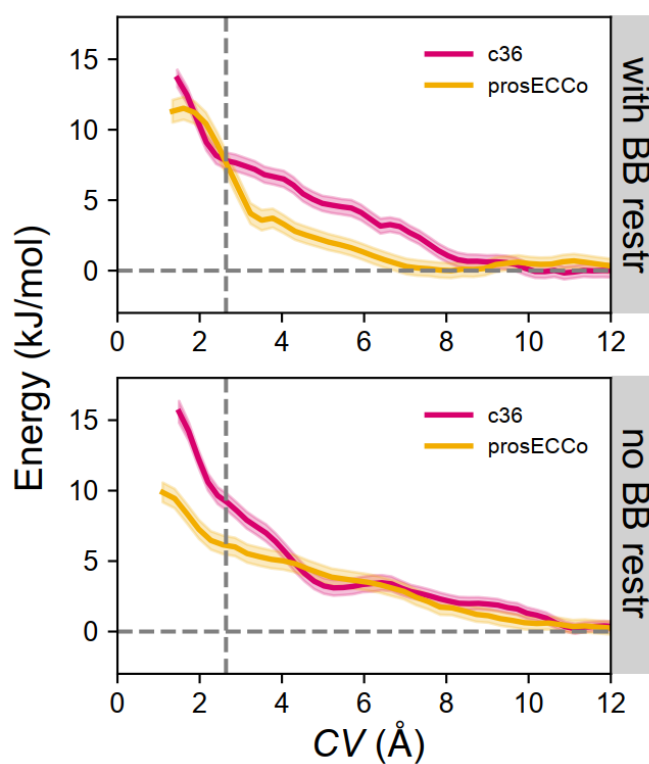

**Figure S4:** Potential of mean force profiles for a  $\text{Na}^+$  ion moving away from the binding site into bulk solution with the c36 and prosECCo force fields.  $\text{Na}^+$  does not appear to bind to the defined binding site. The horizontal grey dashed line represents the free energy of the ion in bulk solution and the vertical grey dashed line is representative of the location of the  $\text{Cl}^-$  ion in the resolved crystal structure in terms of  $CV$ . Samples over 1 ns per umbrella window were used in unbiasing for both force fields.

**Figure S5**

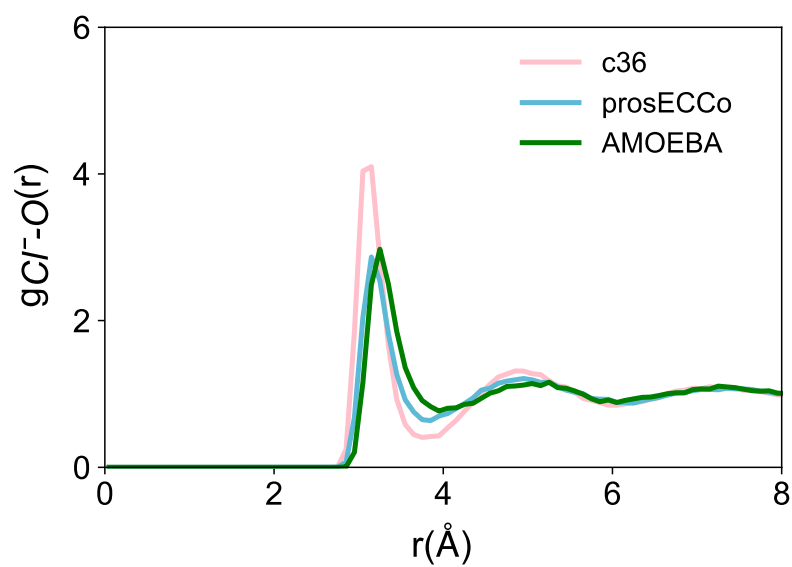

**Figure S5:** Radial distribution functions (RDFs),  $g_{\text{Cl}^--\text{O}}(r)$ , of water oxygen atoms around a  $\text{Cl}^-$  ion in bulk solution with the c36, prosECCo and AMOEBA forcefields.

**Figure S6**

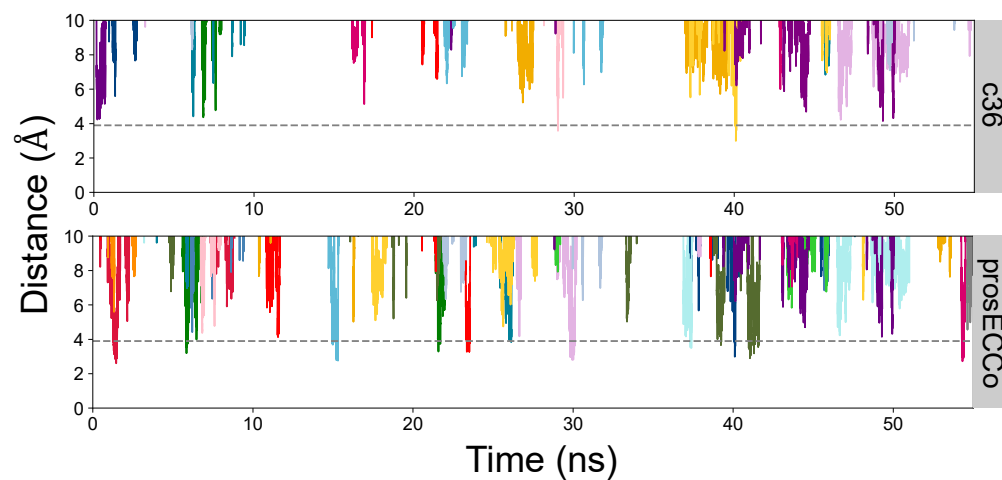

**Figure S6:** Ion-distance plots between  $\text{Cl}^-$  ions to an aliphatic hydrogen atom of A44 within simulations of the whole protein embedded in a lipid bilayer with the c36 and prosECCo forcefields. Each color represents an individual ion trajectory, plotting only the ions that initially come within a distance of 5 Å to the binding site.



**Figure S7**

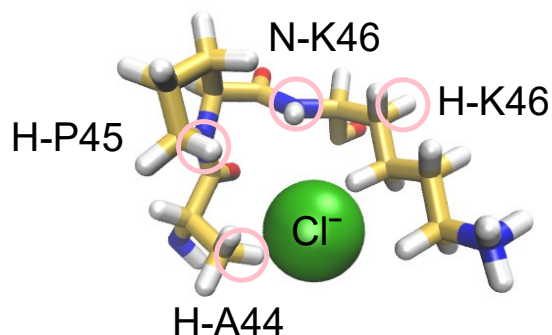

**Figure S7:** Snapshot of a  $\text{Cl}^-$  ion in the binding site. This is an example of where the K46 tail encloses the ion to form a deeper concave shape that facilitates ion binding.

**Figure S8**

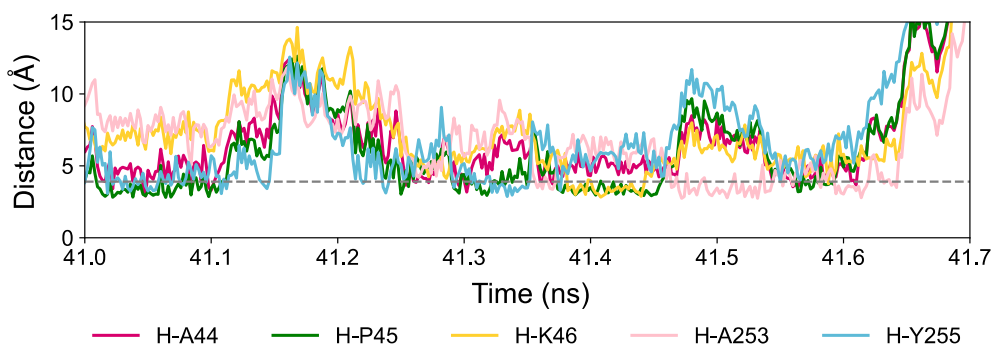

**Figure S8:** Ion-distance plot as a function of time for a  $\text{Cl}^-$  ion in the binding site and residues from a nearby loop. The ion distances were measured from simulations of the whole protein embedded in a lipid bilayer using the proECCo force field. The  $\text{Cl}^-$  is bound to the site (contacts H-A44, H-P45 & H-K46) then dissociates (at  $\sim 41.5$  ns) and forms interactions with residues from the nearby loop (H-A253 & H-Y255).  $\text{Cl}^-$  rebinding can be observed (at  $\sim 41.6$  ns) and the ion is then released into bulk solution (at  $\sim 41.7$  ns).

**Table S1**

| <b>System Size</b>          | <b>Force field</b> | <b>ns/day</b> |
|-----------------------------|--------------------|---------------|
| Whole Protein ~ 82300 atoms | c36                | 110           |
|                             | prosECCo           | 107           |
|                             | AMOEBA             | N/A           |
| Fragments ~ 12100 atoms     | c36                | 690           |
|                             | prosECCo           | 697           |
|                             | AMOEBA             | 28            |

**Table S1:** Computational performance comparison of different system sizes per force field. All systems were benchmarked using 1 GPU (NVIDIA Quadro RTX8000), 1 node with 6 cores (CPUs: Intel Xeon Platinum 8268). c36 and prosECCo have very similar computational costs by running on GROMACS 2020. AMOEBA was run with the OpenMM 7.4.2 implementation which enables GPU acceleration and is considerably more computationally expensive relative to c36 and prosECCo.
